# Supplementary material
Source: HighWire-hosted journal article supplement (http://dmd.aspetjournals.org/highwire/filestream/75097/field_highwire_adjunct_files/0/90969_Supplemental_Data.pdf)
Supplement: 90969_Supplemental_Data.pdf [file 90969_Supplemental_Data.pdf]

## **Supplemental Data**

### **Journal Title**

Drug Metabolism and Disposition

### **Article Title**

Investigating the role of altered systemic albumin concentration on the disposition of theophylline in adult and pediatric asthma patients by using the physiologically based pharmacokinetic approach

### **Authors**

Muhammad Fawad Rasool, Ramsha Khalid, Imran Imran, Abdul Majeed, Hamid Saeed, Fawaz Fayeze Alasmari, Mohammed Mufadhe Alanazi and Faleh Alqahtani

Department of Pharmacy Practice, Faculty of Pharmacy, Bahauddin Zakariya University, 60800 Multan, Pakistan (M.F.R, R.K, A.M)

Department of Pharmacology, Faculty of Pharmacy, Bahauddin Zakariya University, 60800 Multan, Pakistan (I.I)

Section of Pharmaceutics, University College of Pharmacy, Allama Iqbal Campus, University of the Punjab, 54000, Lahore, Pakistan (H.S)

Department of Pharmacology and Toxicology, College of Pharmacy, King Saud University, Riyadh, Saudi Arabia (F.F.A, M.M.A, F.A)

**Supplemental Table 1** Drug-specific input parameters used for model development

| Parameter                   | Value                         | Method/Reference                                                     |                                    |
|-----------------------------|-------------------------------|----------------------------------------------------------------------|------------------------------------|
| Molecular weight (g/mol)    | 180.167                       | (Edginton et al., 2006)                                              |                                    |
| Log $P_{o:w}$               | -0.02                         | (Edginton et al., 2006)                                              |                                    |
| pK <sub>a</sub>             | 8.81                          | Simcyp® simulator compound library                                   |                                    |
| pK <sub>a</sub>             | 0.99                          |                                                                      |                                    |
| Compound type               | Ampholyte                     |                                                                      |                                    |
| Main plasma binding protein | HSA                           |                                                                      |                                    |
| Absorption Model            | ADAM Model                    |                                                                      |                                    |
| P <sub>eff,man</sub> (cm/s) | 4.2×10 <sup>-4</sup>          | Simcyp® simulator compound library                                   |                                    |
| f <sub>uGut</sub>           | 0.88                          | Predicted in Simcyp®                                                 |                                    |
| Distribution Model          | Minimal PBPK                  |                                                                      |                                    |
| V <sub>ss</sub> (L/kg)      | 0.45                          | Simcyp® Prediction Method 1 (Poulin and Theil/ Berezhkovskiy method) |                                    |
| B/P ratio                   | 0.85                          | (Ebden et al., 1986)                                                 |                                    |
| f <sub>u</sub>              | 0.61                          | (Obach et al., 2008)                                                 |                                    |
| Elimination                 |                               |                                                                      |                                    |
| CL <sub>R</sub> (L/h)       | 0.31                          | Simcyp® simulator compound library                                   |                                    |
| Enzymes                     |                               |                                                                      |                                    |
| CYP1A2                      | V <sub>max</sub> <sup>a</sup> | 4.11 <sup>c</sup> , 2.47 <sup>d</sup> , 6.0 <sup>e</sup>             | Simcyp® simulator compound library |
|                             | K <sub>m</sub> <sup>b</sup>   | 394 <sup>c</sup> , 1080 <sup>d</sup> , 377 <sup>e</sup>              |                                    |
| CYP2D6                      | V <sub>max</sub> <sup>a</sup> | 1.8 <sup>e</sup> , 4.68 <sup>c</sup>                                 |                                    |
|                             | K <sub>m</sub> <sup>b</sup>   | 6897 <sup>e</sup> , 10709 <sup>c</sup>                               |                                    |
| CYP3A4                      | V <sub>max</sub> <sup>a</sup> | 0.4 <sup>c</sup>                                                     |                                    |
|                             | K <sub>m</sub> <sup>b</sup>   | 23393 <sup>c</sup>                                                   |                                    |
| CYP2E1                      | V <sub>max</sub> <sup>a</sup> | 40.78 <sup>c</sup>                                                   |                                    |
|                             | K <sub>m</sub> <sup>b</sup>   | 16855 <sup>c</sup>                                                   |                                    |

Log  $P_{o:w}$ ; octanol-water partition coefficient, ADAM; advanced dissolution, absorption and metabolism, HSA; Human serum albumin, P<sub>eff</sub>; effective human jejunum permeability, f<sub>u</sub>; the fraction of unbound drug in plasma, f<sub>uGut</sub>; the unbound fraction of drug in enterocytes, V<sub>ss</sub>; the volume of distribution at steady-state, CL<sub>R</sub>; renal clearance, CYP; cytochrome P-450 enzyme.

<sup>a</sup> Maximum rate of metabolite formation, units: pmol/min/pmol of isoform

<sup>b</sup> Michaelis-Menten constant, units: μMol

<sup>c</sup> 8-OH pathway

<sup>d</sup> N1-demethylation pathway

<sup>e</sup> N3-demethylation pathway

**Supplemental Table 2** Characteristics of clinical data used for model development in healthy adults

| No | Population | No. of subjects | Dose       | Administration route | Age (years) | Weight (kg)  | Female proportion | Reference                   |
|----|------------|-----------------|------------|----------------------|-------------|--------------|-------------------|-----------------------------|
| 1  | Healthy    | 6               | 2.78 mg/kg | iv bolus             | Range 25–32 | -            | 0                 | (Ishizaki et al., 1979)     |
|    | Healthy    | 6               | 4 mg/kg    | iv bolus             | Range 25–32 | -            | 0                 | (Ishizaki et al., 1979)     |
| 2  | Healthy    | 6               | 3.84 mg/kg | iv infusion          | Range 24–57 | -            | 0                 | (Chrzanowski et al., 1977)  |
| 3  | Healthy    | 8               | 6 mg/kg    | iv bolus             | Range 18–25 | Mean 70.6    | 0                 | (St-Pierre et al., 1985)    |
| 4  | Healthy    | 4               | 193.2 mg   | iv bolus             | Range 24–26 | Range 50-70  | 0.75              | (Gundert-Remy et al., 1983) |
|    | Healthy    | 4               | 386.4 mg   | iv bolus             | Range 24-26 | Range 50-70  | 0.75              | (Gundert-Remy et al., 1983) |
| 5  | Healthy    | 8               | 125 mg     | Oral                 | Range 22–35 | Mean 62      | 0.5               | (Rovei et al., 1982)        |
|    | Healthy    | 8               | 250 mg     | Oral                 | Range 22–35 | Mean 62      | 0.5               | (Rovei et al., 1982)        |
|    | Healthy    | 8               | 375 mg     | Oral                 | Range 22–35 | Mean 62      | 0.5               | (Rovei et al., 1982)        |
|    | Healthy    | 8               | 500 mg     | Oral                 | Range 22–35 | Mean 62      | 0.5               | (Rovei et al., 1982)        |
| 6  | Healthy    | 14              | 200 mg     | Oral                 | Range 70–85 | Mean 76      | 0.92              | (Antal et al., 1981)        |
|    | Healthy    | 14              | 200 mg     | Oral                 | Range 19-31 | Mean 23      | 0.92              | (Antal et al., 1981)        |
| 7  | Healthy    | 1               | 250 mg     | Oral                 | 22          | 68           | 0                 | (Lagas and Jonkman, 1983)   |
|    | Healthy    | 1               | 250 mg     | Oral                 | 24          | 85           | 0                 | (Lagas and Jonkman, 1983)   |
| 8  | Healthy    | 6               | 600 mg     | Oral                 | Range 18–65 | -            | -                 | (Gonzalez and Golub, 1983)  |
|    | Healthy    | 6               | 600 mg     | Oral                 | Range 18–65 | -            | -                 | (Gonzalez and Golub, 1983)  |
| 9  | Healthy    | 6               | 250 mg     | Oral                 | Range 19–21 | Range 62-104 | 0                 | (Lelo et al., 1986)         |

**Supplemental Table 3** Characteristics of clinical data used for model development in adults and children with asthma

| No.                         | Population | No. of subjects | Dose      | Administration route | Age (years) | Weight (kg)     | Female proportion | Reference                       |
|-----------------------------|------------|-----------------|-----------|----------------------|-------------|-----------------|-------------------|---------------------------------|
| <b>Adult population</b>     |            |                 |           |                      |             |                 |                   |                                 |
| 1                           | Asthma     | 7               | 5.6 mg/kg | iv bolus             | Range 34-53 | -               | 0.5               | (Mitenko and Ogilvie, 1973)     |
| 2                           | Asthma     | 50              | 351 mg    | iv infusion          | Range 17-80 | Range 51-97     | 0.4               | (Steinijans et al., 1982)       |
| 3                           | Asthma     | 31              | 7.5 mg/kg | Oral                 | Range 20-60 | -               | -                 | (Weinberger and Hendeles, 1986) |
| 4                           | Asthma     | 46              | 600       | Oral                 | Range 45-49 | Range 55.7-63.1 | 0.5               | (Richer et al., 1982)           |
| <b>Pediatric population</b> |            |                 |           |                      |             |                 |                   |                                 |
| 3                           | Asthma     | 10              | 3.2 mg/kg | iv infusion          | Range 1-4   | Range 9.3-16.4  | 0.5               | (Loughnan et al., 1976)         |
| 4                           | Asthma     | 12              | 4 mg/kg   | iv bolus             | Range 6-10  | -               | 0.36              | (Ellis et al., 1976)            |
| 5                           | Asthma     | 40              | 8.2 mg/kg | Oral                 | Range 4-12  | -               | -                 | (Hendeles L, 1985)              |

**Supplemental Table 4** The observed/predicted ratio ( $R_{obs/Pred}$ ), average fold error (AFE) and root mean square error (RMSE) values for pharmacokinetic parameters in adults and children after intravenous and oral theophylline application

| <b>Parameters</b>                                    | <b>Ratio<sub>obs/pred</sub></b> | <b>AFE</b> | <b>RMSE</b> |
|------------------------------------------------------|---------------------------------|------------|-------------|
| <b>Intravenous application in healthy adults</b>     |                                 |            |             |
| AUC <sub>0-∞</sub>                                   | 0.90                            | 0.90       | 8.90        |
| CL                                                   | 1.21                            | 1.16       | 0.01        |
| C <sub>max</sub>                                     | 1.60                            | 1.66       | 5.85        |
| <b>Oral application in healthy adults</b>            |                                 |            |             |
| AUC <sub>0-∞</sub>                                   | 1.05                            | 1.04       | 23.26       |
| CL                                                   | 1.01                            | 0.99       | 0.58        |
| C <sub>max</sub>                                     | 1.06                            | 1.05       | 1.10        |
| <b>Adults with asthma (intravenous &amp; oral)</b>   |                                 |            |             |
| AUC <sub>0-∞</sub>                                   | 1.21                            | 1.21       | 19.92       |
| CL                                                   | 0.94                            | 0.93       | 0.42        |
| C <sub>max</sub>                                     | 1.48                            | 1.43       | 8.54        |
| <b>Children with asthma (intravenous &amp; oral)</b> |                                 |            |             |
| AUC <sub>0-∞</sub>                                   | 0.92                            | 0.92       | 5.64        |
| CL                                                   | 1.39                            | 1.37       | 0.03        |
| C <sub>max</sub>                                     | 1.16                            | 1.16       | 1.75        |

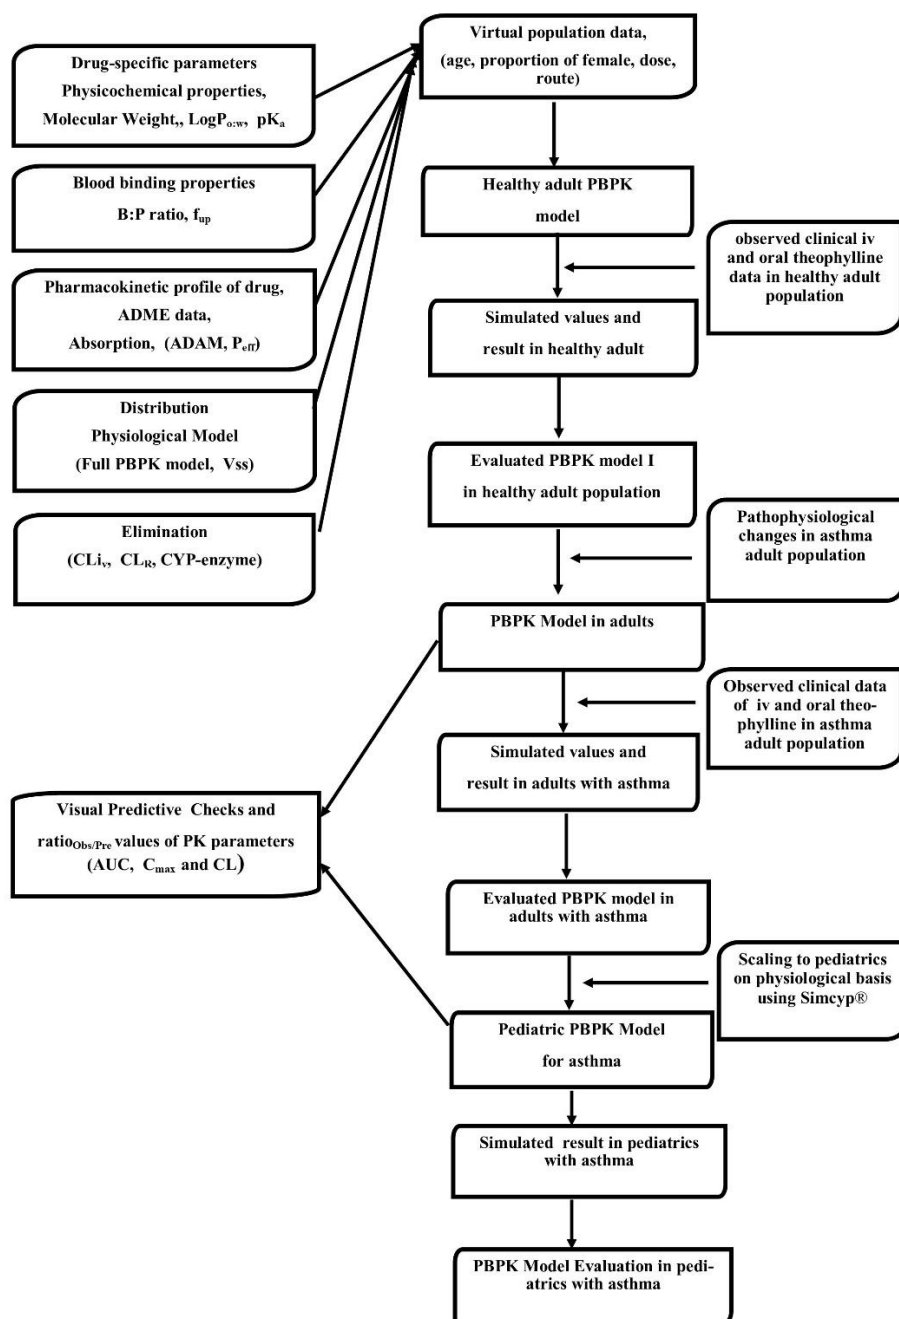

**Supplemental Figure 1** Workflow diagram for developing physiologically based pharmacokinetic (PBPK) model in healthy and asthma (adult and pediatric) population.

Where ADAM: advanced, dissolution, absorption and metabolism,  $\text{Log } P_{o:w}$ : octonal-water partition coefficient,  $pK_a$ : acid dissociation constant,  $P_{\text{eff,man}}$ : human jejunum permeability,  $f_{\text{up}}$ : fraction of unbound drug in plasma,  $CL_{IV}$ : intravenous clearance,  $CL_R$ : renal clearance, CYP: cytochrome P450,  $AUC_{0\text{-last}}$ : Area under the drug concentration time curve from zero to last measured drug concentration time,  $C_{\text{max}}$ : maximum concentration of drug

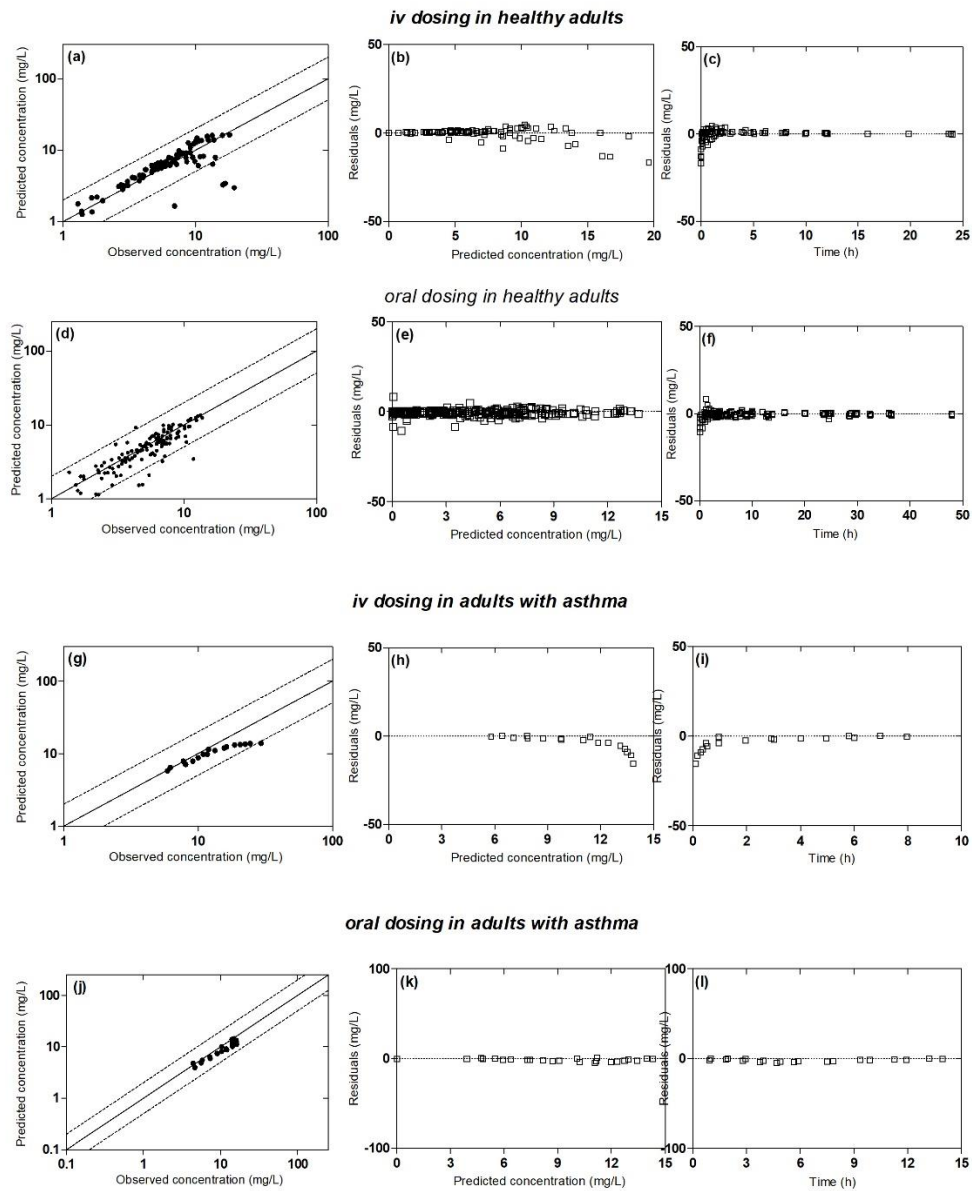

**Supplemental Figure 2** Goodness-of-fit plots for model prediction in adult population.

presented as: (a,d,g,j) plot of predicted versus observed concentration; (b,e,h,k) plots of residual versus predicted concentration; (c,f,i,l) plots of residual versus time; (a-c) iv and (d-f) oral dosing in healthy adult population, (g-i) iv and (j-l) oral dosing in asthma adults. Solid lines show line of identity and dashed line show 2-fold error range

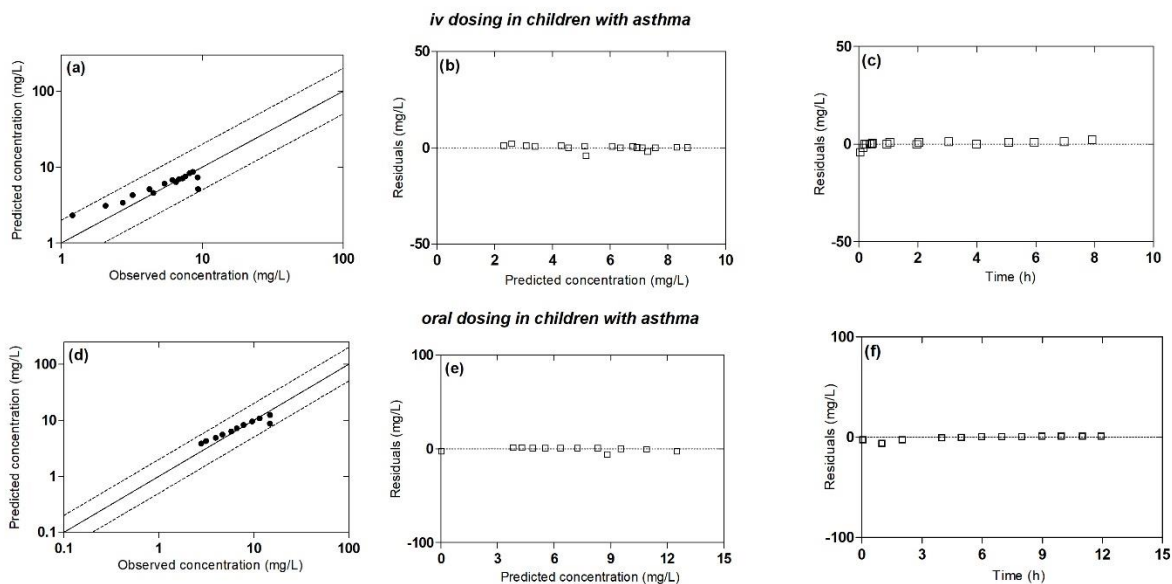

**Supplemental Figure 3** Goodness-of-fit plots for model prediction in pediatric population.

presented as: (a,d) plot of predicted versus observed concentration; (b,e) plots of residual versus predicted concentration; (c,f) plots of residual versus time; (a-c) iv and (d-f) oral dosing in children population with asthma. Solid lines show line of identity and dashed line show 2-fold error range.



## References

- Antal E, Kramer PA, Mercik SA, Chapron D, and Lawson I (1981) Theophylline pharmacokinetics in advanced age. *British journal of clinical pharmacology* **12**:637-645.
- Chrzanowski FA, Niebergall PJ, Mayock RL, Taubin JM, and Sugita ET (1977) Kinetics of intravenous theophylline. *Clinical Pharmacology & Therapeutics* **22**:188-195.
- Ebden P, Banks J, Peel T, Buss DC, Routledge PA, and Spragg BP (1986) The disposition of theophylline in blood in chronic obstructive lung disease. *Therapeutic drug monitoring* **8**:424-426.
- Edginton AN, Schmitt W, and Willmann S (2006) Development and evaluation of a generic physiologically based pharmacokinetic model for children. *Clinical pharmacokinetics* **45**:1013-1034.
- Ellis EF, Koysoko R, and Levy G (1976) Pharmacokinetics of theophylline in children with asthma. *Pediatrics* **58**:542-547.
- Gonzalez MA and Golub AL (1983) THEO-DUR® and THEO-DUR Sprinkle™: Controlled-release delivery systems for theophylline. *Drug Development and Industrial Pharmacy* **9**:1379-1396.
- Gundert-Remy U, Hildebrandt R, Hengen N, and Weber E (1983) Non-linear elimination processes of theophylline. *European journal of clinical pharmacology* **24**:71-78.
- Hendeles L WM (1985) Slow-release theophylline for the management of chronic asthma *Medical Journal* **26**, NO. 1.
- Ishizaki T, Watanabe M, and Morishita N (1979) The effect of assay methods on plasma levels and pharmacokinetics of theophylline: HPLC and EIA. *British journal of clinical pharmacology* **7**:333-341.
- Lagas M and Jonkman J (1983) Greatly enhanced bioavailability of theophylline on postprandial administration of a sustained release tablet. *European journal of clinical pharmacology* **24**:761-767.
- Lelo A, Birkett D, Robson R, and Miners J (1986) Comparative pharmacokinetics of caffeine and its primary demethylated metabolites paraxanthine, theobromine and theophylline in man. *British journal of clinical pharmacology* **22**:177-182.
- Loughnan P, Sitar D, Ogilvie R, Eisen A, Fox Z, and Neims A (1976) Pharmacokinetic analysis of the disposition of intravenous theophylline in young children. *The Journal of pediatrics* **88**:874-879.
- Mitenko PA and Ogilvie RI (1973) Pharmacokinetics of intravenous theophylline. *Clinical Pharmacology & Therapeutics* **14**:509-513.
- Obach RS, Lombardo F, and Waters NJ (2008) Trend analysis of a database of intravenous pharmacokinetic parameters in humans for 670 drug compounds. *Drug Metabolism and Disposition*.
- Richer C, Mathieu M, Bah H, Thuillez C, Duroux P, and Giudicelli JF (1982) Theophylline kinetics and ventilatory flow in bronchial asthma and chronic airflow obstruction: influence of erythromycin. *Clinical Pharmacology & Therapeutics* **31**:579-586.
- Rovei V, Chanoine F, and Benedetti SM (1982) Pharmacokinetics of theophylline: a dose-range study. *British journal of clinical pharmacology* **14**:769-778.
- St-Pierre MV, Spino M, Isles AF, Tesoro A, and MacLeod SM (1985) Temporal variation in the disposition of theophylline and its metabolites. *Clinical Pharmacology & Therapeutics* **38**:89-95.

- Steinijans V, Eicke R, and Ahrens J (1982) Pharmacokinetics of theophylline in patients following short-term intravenous infusion. *European journal of clinical pharmacology* **22**:417-422.
- Weinberger M and Hendeles L (1986) Therapeutic effect and dosing strategies for theophylline in the treatment of chronic asthma. *Journal of Allergy and Clinical Immunology* **78**:762-768.
